# Supplementary material
Source: ML conference proceedings conference paper supplement (https://openaccess.thecvf.com/content/CVPR2024/html/Tan_Siamese_Learning_with_CVPR_2024_paper.html)
Supplement: Supplementary file 1 [file Tan_Siamese_Learning_with_CVPR_2024_supplemental.pdf]

# Siamese Learning with Joint Alignment and Regression for Weakly-Supervised Video Paragraph Grounding

## Supplementary Materials

Chaolei Tan<sup>1</sup> Jianhuang Lai<sup>1,2,3</sup> Wei-Shi Zheng<sup>1,2,3</sup> Jian-Fang Hu<sup>1,2,3</sup>

<sup>1</sup>School of Computer Science and Engineering, Sun Yat-sen University, China

<sup>2</sup>Guangdong Province Key Laboratory of Information Security Technology, China

<sup>3</sup>Key Laboratory of Machine Intelligence and Advanced Computing, Ministry of Education, China

tanchlei@mail2.sysu.edu.cn, stsljh@mail.sysu.edu.cn, wszheng@ieee.org, hujf5@mail.sysu.edu.cn

### A. Implementation Details

In this section, we aim to supply more implementation details about the two data augmentation strategies and the concrete formulations of the three auxiliary losses.

#### A.1. Data Augmentation

**Random Boundary Shifting (RBS).** To combat the potential synthesis artifacts and boundary uncertainty, the pseudo temporal labels in the augmentation branch are added with small random offsets for training. Concretely, the boundary offsets  $\Delta I^{\text{st}}$  and  $\Delta I^{\text{ed}}$  are randomly sampled from a uniform distribution ranging from 0 to the value of multiplying a percentage  $p$  with the re-scaled length of the foreground video feature sequence. As a scalar hyper-parameter, the value of  $p$  is 0.1, 0.175 and 0.1 for ActivityNet-Captions, Charades-CD-OOD and TACoS datasets, respectively.

**Random Re-Sampling (RRS).** We randomly re-scale the length of the foreground video to increase the sample diversity when generating the pseudo videos for training. Specifically, the re-scaled feature sequence is obtained by a strided sampling from the original feature sequence. The stride is randomly acquired from a uniform distribution with a range of [0.75, 3], [1, 3] and [1, 15] for ActivityNet-Captions, Charades-CD-OOD and TACoS datasets, respectively.

#### A.2. Auxiliary Losses

**Cross-Branch Loss.** In our siamese learning framework, the augmentation branch and inference branch are designed for grounding the paragraph queries and sentence queries from different input video streams. The cross-branch loss  $\mathcal{L}_{\text{cb}}$  aims to mine the potential supervision provided by the semantic consistent constraint as follows:

$$\mathcal{L}_{\text{cb}} = 1 - \text{Sim}(\mathcal{Q}_{\text{aug}}^{\text{s}}, \text{StopGrad}(\mathcal{Q}_{\text{inf}}^{\text{s}})) + 1 - \text{Sim}(\text{StopGrad}(\mathcal{Q}_{\text{aug}}^{\text{p}}), \mathcal{Q}_{\text{inf}}^{\text{p}}) \quad (1)$$

where  $\mathcal{Q}_{\text{aug}}^{\text{s}}$  and  $\mathcal{Q}_{\text{inf}}^{\text{s}}$  are the hidden features for sentence queries in decoder layers of the augmentation branch and

the inference branch, respectively. Likewise,  $\mathcal{Q}_{\text{aug}}^{\text{p}}$  and  $\mathcal{Q}_{\text{inf}}^{\text{p}}$  are the hidden features for paragraph queries in the decoder layers of the augmentation branch and the inference branch, respectively.  $\text{Sim}(\cdot)$  is the cosine similarity function and  $\text{StopGrad}(\cdot)$  is the gradient-stopping operation.

**Anchor Ranking Loss.** As illustrated in the manuscript, there exists a chronological relationship between sentences in the same paragraph. Since our query decoder adopts a set of dynamic anchors to represent query-specific location information during the decoding process, the anchor ranking loss  $\mathcal{L}_{\text{ar}}$  is employed to guide the intermediate query locations to be temporally ordered, which is given as follows:

$$\mathcal{L}_{\text{ar}} = \text{Max}(0, d + \mathcal{C}(\mathcal{A}_i) - \mathcal{C}(\mathcal{A}_{i+1})) \quad (2)$$

where  $\mathcal{A}_i$  and  $\mathcal{A}_{i+1}$  are the anchor boxes of the  $i$ -th and  $(i+1)$ -th sentence queries of the last decoder layer in the inference branch, respectively.  $\mathcal{C}(\cdot)$  denotes calculating the temporal center point of a given anchor box and  $d$  is the distance that is set to  $\frac{1}{2N}$ , where  $N$  is the number of sentences.

**Pseudo Attention Loss.** The ability of the query decoder in associating relevant visual content and textual descriptions can be directly reflected by the cross-modal attention weights produced by the query decoder layers. Based on the pseudo boundaries in the augmentation branch, we employ a loss to encourage the paragraph-to-video attention to be activated only within the relevant temporal regions. Specifically, we define the pseudo attention loss  $\mathcal{L}_{\text{pa}}$  as:

$$\mathcal{L}_{\text{pa}} = -\frac{1}{K_{\text{dec}}} \sum_{i=1}^{K_{\text{dec}}} \log \left( \sum_{t=1}^T m(t) \alpha_{\text{p}}^{(i)}(t) \right) \quad (3)$$

where  $\alpha_{\text{p}}^{(i)}(t)$  is the attention between the paragraph query and the  $t$ -th encoded clip feature at the  $i$ -th decoder layer.  $m(t)$  denotes a mask that takes 1 for  $t \in [\tau_{\text{aug}}^{\text{st}}, \tau_{\text{aug}}^{\text{ed}}]$  and takes 0 otherwise.  $K_{\text{dec}}$  is the number of decoder layers.
